# Supplementary figures and images for: Morphological and Genetic Characterization of Local Maize Accessions from Emilia Romagna Region, Italy
Source: MDPI journal article supplement (doi:10.3390/su14010091), 2021-12-22

- EMR03
- EMR04
- EMR06
- EMR07
- EMR10
- EMR13
- EMR01

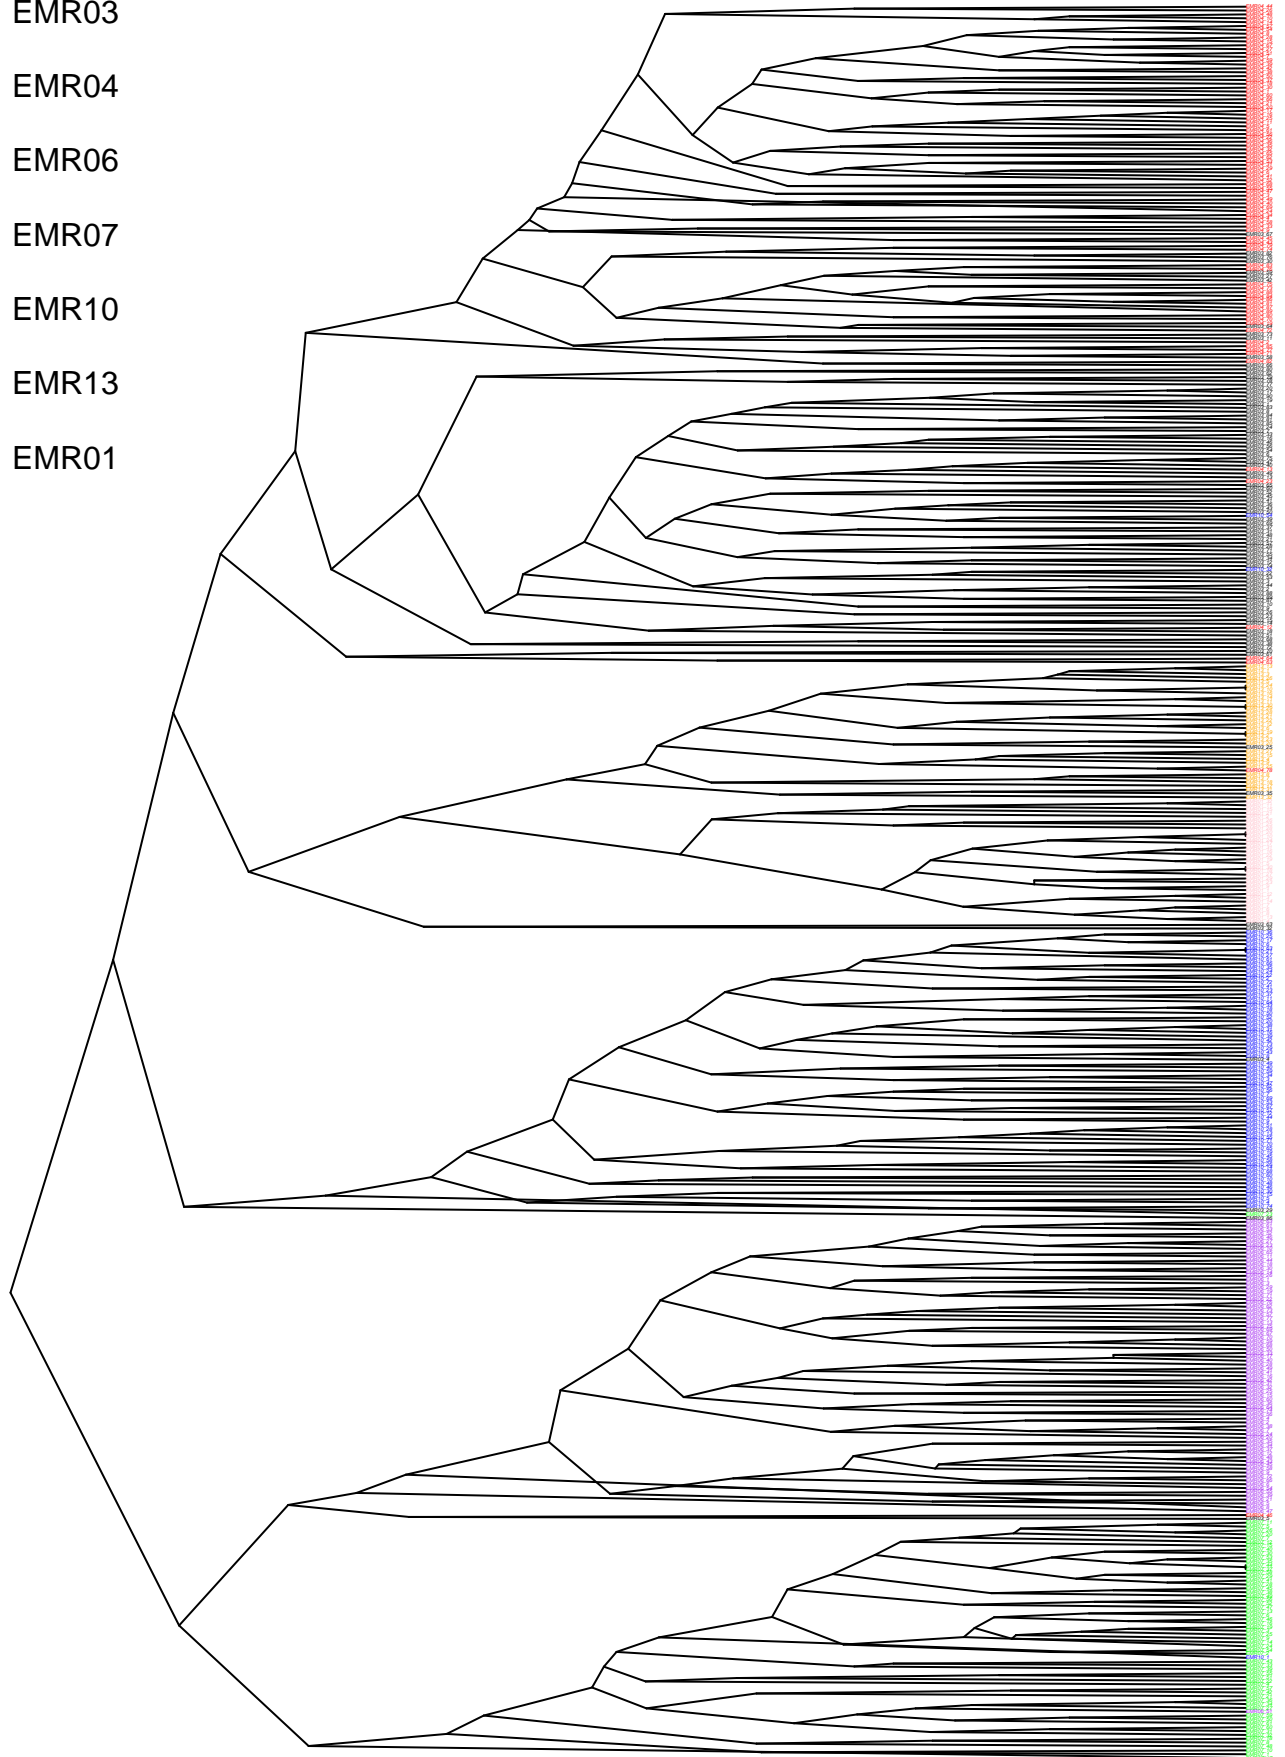

Supplement: s1 [file s1]
